# Supplementary material for: Comparison of Two Commercially Available qPCR Kits for the Detection of Candida auris
Source: PubMed Central journal article supplement (PMC7926799; doi:10.3390/jof7020154), 2021-02-22
Supplement: jof-07-00154-s001.pdf [file jof-07-00154-s001.pdf]

# Comparison of two commercially available qPCR kits for the detection of *Candida auris*

Janko Sattler, Janina Noster, Anne Brunke, Georg Plum, Pia Wiegel, Oliver Kurzai, Jacques F. Meis and Axel Hamprecht

## Supplementary Data

**Table S 1.** *C. auris* isolates used in this study. BSI, blood stream infection.

| Clade  | Isolate   | Origin    | State       |
|--------|-----------|-----------|-------------|
| I      | 382       | BSI       | India       |
|        | 387       | BSI       | Pakistan    |
|        | 388       | BSI       | Pakistan    |
|        | 389       | BSI       | India       |
|        | 390       | BSI       | India       |
|        | 10081242  | Skin swab | UK          |
|        | 10111019  | Urine     | Netherlands |
|        | 10051259  | BSI       | India       |
|        | 10081640  | BSI       | South Asia  |
|        | 10081113  | BSI       | South Asia  |
|        | 10081274  | BSI       | Kuwait      |
|        | 10081273  | BSI       | Kuwait      |
|        | 10110808  | BSI       | South Asia  |
|        | 10110990  | BSI       | Montenegro  |
|        | 10110211  | BSI       | Netherlands |
|        | 10081227  | BSI       | Belgium     |
| C10777 | Skin swab | Germany   |             |
| II     | 381       | BSI       | Japan       |
|        | 10031062  | BSI       | South Korea |
| III    | 383       | BSI       | S. Africa   |
|        | 384       | BSI       | S. Africa   |
|        | 10051549  | BSI       | S. Africa   |
|        | 10081199  | BSI       | Spain       |
|        | 10081197  | BSI       | Spain       |
| IV     | 385       | BSI       | Venezuela   |
|        | 386       | BSI       | Venezuela   |
|        | 10111014  | BSI       | Colombia    |
|        | 10111015  | BSI       | Colombia    |
| V      | 10111018  | BSI       | Iran        |

**Table S 2.** qPCR protocols applied for the different kits.

| Kit            | Activation    | Denaturation | Annealing   | Cycles |
|----------------|---------------|--------------|-------------|--------|
| Fungiplex CaRT | 95 °C, 15 min | 95 °C, 5 s   | 60 °C, 30 s | 45     |
| AurisID        | 95 °C, 2 min  | 95 °C, 10 s  | 60 °C, 30 s | 40     |

**Table S 3.** Thresholds for false-positive results. Both kits were challenged with serial dilutions of DNA extracted from eight negative controls.

| Isolate/strain             | Threshold false-positive PCR (copies/reaction) |           |
|----------------------------|------------------------------------------------|-----------|
|                            | AurisID                                        | Fungiplex |
| <i>C. duobushaemulonii</i> | 5x10 <sup>5</sup>                              | -         |
| <i>C. haemulonii</i>       | 5x10 <sup>6</sup>                              | -         |
| <i>C. pseudohaemulonii</i> | 5x10 <sup>6</sup>                              | -         |
| <i>C. albicans</i>         | -                                              | -         |
| <i>C. glabrata</i>         | -                                              | -         |
| <i>C. krusei</i>           | -                                              | -         |
| <i>C. parapsilosis</i>     | -                                              | -         |
| <i>C. tropicalis</i>       | -                                              | -         |

**Table S 4.** PCR positivity in relation to *C. auris* clade. Shown is the number of correctly identified isolates from each clade at the respective copy number.

| Clade | No. of isolates | Assay     | Isolates detected (%) |                    |                      |                       |
|-------|-----------------|-----------|-----------------------|--------------------|----------------------|-----------------------|
|       |                 |           | 50 copies/ reaction   | 5 copies/ reaction | 0.5 copies/ reaction | 0.05 copies/ reaction |
| I     | 17              | AurisID   | 17 (100%)             | 17 (100%)          | 13 (76%)             | 1 (6%)                |
|       |                 | Fungiplex | 17 (100%)             | 14 (82%)           | 0 (0%)               | 0 (0%)                |
| II    | 2               | AurisID   | 2 (100%)              | 2 (100%)           | 1 (50%)              | 0 (0%)                |
|       |                 | Fungiplex | 2 (100%)              | 1 (50%)            | 0 (0%)               | 0 (0%)                |
| III   | 5               | AurisID   | 5 (100%)              | 5 (100%)           | 4 (80%)              | 0 (0%)                |
|       |                 | Fungiplex | 5 (100%)              | 4 (80%)            | 0 (0%)               | 0 (0%)                |
| IV    | 4               | AurisID   | 4 (100%)              | 4 (100%)           | 2 (50%)              | 0 (0%)                |
|       |                 | Fungiplex | 4 (100%)              | 1 (25%)            | 0 (0%)               | 0 (0%)                |
| V     | 1               | AurisID   | 1 (100%)              | 1 (100%)           | 0 (0%)               | 0 (0%)                |
|       |                 | Fungiplex | 1 (100%)              | 1 (100%)           | 0 (0%)               | 0 (0%)                |

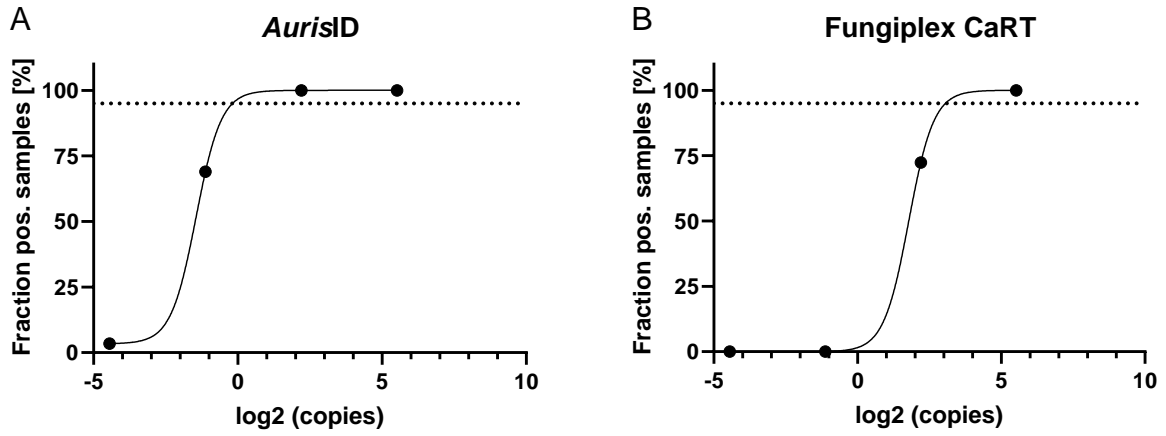

**Figure S 1.** Determination of the limit of detection for (A) *AurisID* and (B) Fungiplex CaRT. The LoD was calculated as the threshold which resulted in 95% positive samples.
